# Supplementary material for: Carotid Plaque Age Is a Feature of Plaque Stability Inversely Related to Levels of Plasma Insulin
Source: PLoS One. 2011 Apr 7;6(4):e18248. doi: 10.1371/journal.pone.0018248 (PMC3072386; doi:10.1371/journal.pone.0018248)
Supplement: Table S6 — 100 top-ranked genes correlated to low plaque age. (XLS) [file pone.0018248.s006.xls]

## Sheet: TableS6
Table S6. 100 top-ranked genes correlated to low plaque age
Gene Name	Gene Symbol	Refseq	P-value	SpearRankCorr
TAF11 RNA POLYMERASE II, TATA BOX BINDING PROTEIN (TBP)-ASSOCIATED FACTOR, 28KDA	TAF11	NM_005643	0	1.
POSTSYNAPTIC PROTEIN CRIPT	CRIPT	NM_014171	0	1.
WD REPEAT DOMAIN 63	Wdr63	NM_145172	0	1.
PHOSPHODIESTERASE 4C, CAMP-SPECIFIC (PHOSPHODIESTERASE E1 DUNCE HOMOLOG, DROSOPHILA)	PDE4C	NM_000923	0.000454149	-0.9642857142857143
ATPASE, H+/K+ TRANSPORTING, NONGASTRIC, ALPHA POLYPEPTIDE	atp12a	NM_001676	0.000454149	-0.9642857142857143
MYOGENIC FACTOR 6 (HERCULIN)	MYF6	NM_002469	0.000454149	-0.9642857142857143
PHOSPHOENOLPYRUVATE CARBOXYKINASE 1 (SOLUBLE)	pck1	NM_002591	0.000454149	-0.9642857142857143
MALIGNANT T CELL AMPLIFIED SEQUENCE 1	Mcts1	NM_014060	0.000454149	0.9642857142857143
PHOSPHATIDYLINOSITOL GLYCAN, CLASS G	Pigg	NM_017733	0.000454149	0.9642857142857143
STERILE ALPHA MOTIF DOMAIN CONTAINING 4B	Samd4b	NM_018028	0.000454149	-0.9642857142857143
NUDIX (NUCLEOSIDE DIPHOSPHATE LINKED MOIETY X)-TYPE MOTIF 15	nudt15	NM_018283	0.000454149	0.9642857142857143
NEDD4 FAMILY INTERACTING PROTEIN 2	NDFIP2	NM_019080	0.000454149	0.9642857142857143
EUKARYOTIC TRANSLATION INITIATION FACTOR 2B, SUBUNIT 3 GAMMA, 58KDA	EIF2B3	NM_020365	0.000454149	0.9642857142857143
HYPOTHETICAL PROTEIN FLJ21103	FAM118B	NM_024556	0.000454149	0.9642857142857143
CHROMOSOME 12 OPEN READING FRAME 32	C12orf32	NM_031465	0.000454149	0.9642857142857143
CHROMOSOME 9 OPEN READING FRAME 96	C9orf96	NM_153710	0.000454149	-0.9642857142857143
OPPOSITE STRAND TRANSCRIPTION UNIT TO STAG3	GATS	NM_178831	0.000454149	0.9642857142857143
PROSTAGLANDIN E RECEPTOR 1 (SUBTYPE EP1), 42KDA	Ptger1	NM_000955	0.00251947	-0.9285714285714286
EPH RECEPTOR B1	EPHB1	NM_004441	0.00251947	0.9285714285714286
TETRASPANIN 8	Tspan8	NM_004616	0.00251947	0.9285714285714286
RAB11A, MEMBER RAS ONCOGENE FAMILY	RAB11A	NM_004663	0.00251947	0.9285714285714286
HECT DOMAIN AND RLD 2	HERC2	NM_004667	0.00251947	0.9285714285714286
HEAT SHOCK 70KDA PROTEIN 5 (GLUCOSE-REGULATED PROTEIN, 78KDA)	HSPA5	NM_005347	0.00251947	0.9285714285714286
NEUROGENIN 1	NEUROG1	NM_006161	0.00251947	0.9285714285714286
INSULIN RECEPTOR-RELATED RECEPTOR	INSRR	NM_014215	0.00251947	-0.9285714285714286
RTF1, PAF1/RNA POLYMERASE II COMPLEX COMPONENT, HOMOLOG (S. CEREVISIAE)	rtf1	NM_015138	0.00251947	0.9285714285714286
GLUCURONYL C5-EPIMERASE	glcE	NM_015554	0.00251947	0.9285714285714286
AUTISM SUSCEPTIBILITY CANDIDATE 2	AUTS2	NM_015570	0.00251947	-0.9285714285714286
MITOCHONDRIAL RIBOSOMAL PROTEIN S18C	MRPS18C	NM_016067	0.00251947	0.9285714285714286
PLASMA GLUTAMATE CARBOXYPEPTIDASE	Pgcp	NM_016134	0.00251947	0.9285714285714286
UBIQUITIN-FOLD MODIFIER CONJUGATING ENZYME 1	Ufc1	NM_016406	0.00251947	0.9285714285714286
CHROMOSOME 3 OPEN READING FRAME 1	C3orf1	NM_016589	0.00251947	0.9285714285714286
HYPOTHETICAL PROTEIN FLJ20309	FLJ20309	NM_017759	0.00251947	-0.9285714285714286
POLYMERASE (RNA) III (DNA DIRECTED) POLYPEPTIDE B	POLR3B	NM_018082	0.00251947	0.9285714285714286
RING FINGER PROTEIN 150	RNF150	NM_020724	0.00251947	-0.9285714285714286
MYOSIN REGULATORY LIGHT CHAIN MRCL3	MRLC2	NM_033546	0.00251947	0.9285714285714286
ASPARAGINE-LINKED GLYCOSYLATION 14 HOMOLOG (YEAST)	ALG14	NM_144988	0.00251947	0.9285714285714286
ELMO/CED-12 DOMAIN CONTAINING 2	ELMOD2	NM_153702	0.00251947	0.9285714285714286
TAP BINDING PROTEIN (TAPASIN)	Tapbp	NM_172208	0.00251947	0.9285714285714286
PROTEIN DISULFIDE ISOMERASE-LIKE PROTEIN OF THE TESTIS	PDILT	NM_174924	0.00251947	-0.9285714285714286
ZONA PELLUCIDA GLYCOPROTEIN 1 (SPERM RECEPTOR)	ZP1	NM_207341	0.00251947	-0.9285714285714286
COLLAGEN, TYPE III, ALPHA 1 (EHLERS-DANLOS SYNDROME TYPE IV, AUTOSOMAL DOMINANT)	COL3A1	NM_000090	0.00680719	0.8928571428571429
CHROMOSOME 14 OPEN READING FRAME 174	C14orf174	NM_001010860	0.00680719	-0.8928571428571429
SIMILAR TO RIKEN CDNA 4933434I20	LOC152586	NM_001034840	0.00680719	-0.8928571428571429
HEAT SHOCK FACTOR BINDING PROTEIN 1	hsbp1	NM_001537	0.00680719	0.8928571428571429
CYTOCHROME C OXIDASE SUBUNIT VIIB	COX7B	NM_001866	0.00680719	0.8928571428571429
GENERAL TRANSCRIPTION FACTOR IIE, POLYPEPTIDE 2, BETA 34KDA	GTF2E2	NM_002095	0.00680719	0.8928571428571429
POLY(A)-SPECIFIC RIBONUCLEASE (DEADENYLATION NUCLEASE)	PARN	NM_002582	0.00680719	0.8928571428571429
DUAL-SPECIFICITY TYROSINE-(Y)-PHOSPHORYLATION REGULATED KINASE 4	Dyrk4	NM_003845	0.00680719	0.8928571428571429
ELASTASE 3A, PANCREATIC	ELA3B	NM_005747	0.00680719	-0.8928571428571429
PHOSPHODIESTERASE 6H, CGMP-SPECIFIC, CONE, GAMMA	Pde6h	NM_006205	0.00680719	-0.8928571428571429
SECRETOGLOBIN, FAMILY 1D, MEMBER 1	SCGB1D1	NM_006552	0.00680719	-0.8928571428571429
COMPLEMENT COMPONENT 1, Q SUBCOMPONENT-LIKE 1	C1QL1	NM_006688	0.00680719	0.8928571428571429
CHROMOSOME 6 OPEN READING FRAME 10	C6orf10	NM_006781	0.00680719	0.8928571428571429
SPLICING FACTOR 3A, SUBUNIT 3, 60KDA	SF3A3	NM_006802	0.00680719	0.8928571428571429
BROMODOMAIN CONTAINING 3	brd3	NM_007371	0.00680719	-0.8928571428571429
OLFACTORY RECEPTOR, FAMILY 1, SUBFAMILY A, MEMBER 1	OR1A1	NM_014565	0.00680719	-0.8928571428571429
REX2, RNA EXONUCLEASE 2 HOMOLOG (S. CEREVISIAE)	REXO2	NM_015523	0.00680719	0.8928571428571429
HYPOTHETICAL PROTEIN FLJ20130	Nup62cl	NM_017681	0.00680719	0.8928571428571429
CHROMOSOME 12 OPEN READING FRAME 41	C12orf41	NM_017822	0.00680719	0.8928571428571429
HISTONE DEACETYLASE 8	Hdac8	NM_018486	0.00680719	0.8928571428571429
SAR1 GENE HOMOLOG A (S. CEREVISIAE)	SAR1A	NM_020150	0.00680719	0.8928571428571429
PYRUVATE DEHYDROGENASE PHOSPHATASE ISOENZYME 2	pdp2	NM_020786	0.00680719	-0.8928571428571429
RHO GTPASE ACTIVATING PROTEIN 20	Arhgap20	NM_020809	0.00680719	0.8928571428571429
HYPOTHETICAL PROTEIN FLJ13910	LOC285074	NM_022780	0.00680719	0.8928571428571429
TRANSMEMBRANE CHANNEL-LIKE 5	Tmc5	NM_024780	0.00680719	-0.8928571428571429
LEUCINE RICH REPEAT CONTAINING 27	LRRC27	NM_030626	0.00680719	0.8928571428571429
TRANSMEMBRANE PROTEIN 126A	Tmem126a	NM_032273	0.00680719	0.8928571428571429
DCN1, DEFECTIVE IN CULLIN NEDDYLATION 1, DOMAIN CONTAINING 5 (S. CEREVISIAE)	DCUN1D5	NM_032299	0.00680719	0.8928571428571429
CDC14 CELL DIVISION CYCLE 14 HOMOLOG B (S. CEREVISIAE)	CDC14B	NM_033331	0.00680719	-0.8928571428571429
PREMATURELY TERMINATED MRNA DECAY FACTOR-LIKE	LOC91431	NM_138698	0.00680719	0.8928571428571429
PHOSPHOLIPASE D FAMILY, MEMBER 4	PLD4	NM_138790	0.00680719	-0.8928571428571429
CHROMOSOME 18 OPEN READING FRAME 24	C18orf24	NM_145060	0.00680719	-0.8928571428571429
LACTATION ELEVATED-1	LACE1	NM_145315	0.00680719	0.8928571428571429
A KINASE (PRKA) ANCHOR PROTEIN (YOTIAO) 9	AKAP9	NM_147166	0.00680719	0.8928571428571429
CHROMOSOME 20 OPEN READING FRAME 132	C20orf132	NM_152503	0.00680719	0.8928571428571429
LIX1 HOMOLOG (MOUSE)	LIX1	NM_153234	0.00680719	0.8928571428571429
CHROMOSOME 10 OPEN READING FRAME 91	C10orf91	NM_173541	0.00680719	-0.8928571428571429
UNC-5 HOMOLOG C (C. ELEGANS)-LIKE	UNC5CL	NM_173561	0.00680719	0.8928571428571429
HYPOTHETICAL PROTEIN FLJ40235	FLJ40235	NM_173635	0.00680719	-0.8928571428571429
F-BOX PROTEIN 36	FBXO36	NM_174899	0.00680719	0.8928571428571429
HYPOTHETICAL PROTEIN LOC201895	C4orf34	NM_174921	0.00680719	0.8928571428571429
TESTIS-SPECIFIC SERINE KINASE 4	TSSK4	NM_174944	0.00680719	-0.8928571428571429
INTEGRIN, ALPHA 6	Itga6	NM_000210	0.0136973	0.8571428571428571
COMPLEMENT COMPONENT 7	C7	NM_000587	0.0136973	0.8571428571428571
OLFACTORY RECEPTOR, FAMILY 8, SUBFAMILY D, MEMBER 2	OR8D2	NM_001002918	0.0136973	0.8571428571428571
FLJ16171 PROTEIN	FLJ16171	NM_001004348	0.0136973	-0.8571428571428571
HYPOTHETICAL PROTEIN BA255A11.3	ANKRD18B	NM_001013728	0.0136973	-0.8571428571428571
ATPASE, H+ TRANSPORTING, LYSOSOMAL 31KDA, V1 SUBUNIT E1	ATP6V1E1	NM_001696	0.0136973	0.8571428571428571
ATP SYNTHASE, H+ TRANSPORTING, MITOCHONDRIAL F1 COMPLEX, O SUBUNIT (OLIGOMYCIN SENSITIVITY CONFERRING PROTEIN)	ATP5O	NM_001697	0.0136973	0.8571428571428571
CAMP RESPONSIVE ELEMENT MODULATOR	Crem	NM_001881	0.0136973	0.8571428571428571
GUANINE NUCLEOTIDE BINDING PROTEIN (G PROTEIN), BETA POLYPEPTIDE 3	GNB3	NM_002075	0.0136973	-0.8571428571428571
HISTIDINE AMMONIA-LYASE	HAL	NM_002108	0.0136973	-0.8571428571428571
INTER-ALPHA (GLOBULIN) INHIBITOR H1	ITIH1	NM_002215	0.0136973	-0.8571428571428571
LOW DENSITY LIPOPROTEIN RECEPTOR-RELATED PROTEIN 4	LRP4	NM_002334	0.0136973	0.8571428571428571
MDM4, TRANSFORMED 3T3 CELL DOUBLE MINUTE 4, P53 BINDING PROTEIN (MOUSE)	MDM4	NM_002393	0.0136973	-0.8571428571428571
PROTEASOME (PROSOME, MACROPAIN) SUBUNIT, ALPHA TYPE, 6	Psma6	NM_002791	0.0136973	0.8571428571428571
PROTEIN TYROSINE PHOSPHATASE, NON-RECEPTOR TYPE 9	PTPN9	NM_002833	0.0136973	0.8571428571428571
PROTEIN TYROSINE PHOSPHATASE, RECEPTOR TYPE, M	PTPRM	NM_002845	0.0136973	0.8571428571428571
SUCCINATE DEHYDROGENASE COMPLEX, SUBUNIT B, IRON SULFUR (IP)	sdhB	NM_003000	0.0136973	0.8571428571428571
