# Supplementary material for: Carotid Plaque Age Is a Feature of Plaque Stability Inversely Related to Levels of Plasma Insulin
Source: PLoS One. 2011 Apr 7;6(4):e18248. doi: 10.1371/journal.pone.0018248 (PMC3072386; doi:10.1371/journal.pone.0018248)
Supplement: Table S12 — Clinical symptoms at entry. (XLS) [file pone.0018248.s012.xls]

## Sheet: TableS12
Table S12. Clinical symptoms at entry
	All patients	High plaque age	Intermediate plaque age	Low plaque age
Symptoms at entry	(n=29)	(n=10)	(n=9)	(n=10)
Symtomatic
Stroke	7	3	2	2
Transient ischemic attack (TIA)	9	3	2	4
Unknown	9	3	3	3
Asymptomatic
Aortic aneurysm	1	0	1	0
Kidney artery stenosis	1	0	1	0
Carotid murmur	2	1	0	1
Patients eligible for carotid stenosis surgery. All patients but four had symptoms prior to surgery.
